# Supplementary material for: Therapeutic options for mucinous ovarian carcinoma
Source: PubMed Central journal article supplement — Gynecol Oncol. Author manuscript; Available in PMC 2021 Mar 1. (PMC7056511; doi:10.1016/j.ygyno.2019.12.015), 2020-01-02
Supplement: NIHMS1548042-supplement-3.pdf [file NIHMS1548042-supplement-3.pdf]

**Supplementary Table 2 – IHC summary. P-values ≤0.01 in bold (Fisher’s exact test).**

|             |                       | <b>BDL</b> | <b>1</b> | <b>2</b> | <b>3</b> | <b>EOM</b> |              | <b>BDL</b> | <b>MOC</b> | <b>EOM</b> |                  |
|-------------|-----------------------|------------|----------|----------|----------|------------|--------------|------------|------------|------------|------------------|
| <b>CK7</b>  | Focal                 | 0          | 5        | 2        | 1        | 5          | <b>0.004</b> | 0          | 8          | 5          | <b>0.001</b>     |
| 274         | Negative              | 2          | 2        | 2        | 0        | 4          |              | 2          | 5          | 4          |                  |
|             | Positive              | 77         | 70       | 58       | 22       | 24         |              | 77         | 153        | 25         |                  |
| <b>CK20</b> | Focal                 | 43         | 15       | 19       | 10       | 5          | <b>0.002</b> | 43         | 45         | 6          | <b>0.001</b>     |
| 221         | Negative              | 19         | 13       | 18       | 6        | 7          |              | 19         | 36         | 7          |                  |
|             | Positive              | 16         | 16       | 11       | 3        | 20         |              | 16         | 31         | 20         |                  |
| <b>CDX2</b> | Focal                 | 27         | 10       | 7        | 8        | 2          | 0.079        | 27         | 27         | 2          | 0.152            |
| 175         | Negative              | 25         | 14       | 18       | 5        | 8          |              | 25         | 35         | 9          |                  |
|             | Positive              | 23         | 4        | 13       | 3        | 8          |              | 23         | 20         | 8          |                  |
| <b>PAX8</b> | Focal                 | 18         | 12       | 8        | 3        | 1          | 0.172        | 18         | 24         | 1          | 0.196            |
| 211         | Negative              | 54         | 37       | 26       | 9        | 16         |              | 54         | 75         | 16         |                  |
|             | Positive              | 6          | 6        | 7        | 6        | 2          |              | 6          | 18         | 3          |                  |
| <b>HER2</b> | 2+                    | 0          | 1        | 1        | 0        | 1          | <b>0.001</b> | 0          | 2          | 1          | <b>&lt;0.001</b> |
| 168         | Negative              | 79         | 16       | 23       | 11       | 17         |              | 79         | 50         | 18         |                  |
|             | Positive              | 3          | 7        | 4        | 4        | 1          |              | 3          | 16         | 1          |                  |
|             | Mutant                |            |          |          |          |            |              |            |            |            |                  |
| <b>p53</b>  | cytoplasmic           | 0          | 0        | 1        | 0        | 0          | <b>0.002</b> | 0          | 1          | 0          | <b>0.001</b>     |
| 165         | Mutant loss           | 7          | 8        | 5        | 1        | 1          |              | 7          | 16         | 1          |                  |
|             | Mutant overexpression | 10         | 22       | 22       | 12       | 3          |              | 10         | 58         | 3          |                  |
|             | WT                    | 25         | 18       | 10       | 4        | 16         |              | 25         | 35         | 17         |                  |
| <b>p16</b>  | Focal                 | 19         | 5        | 7        | 3        | 3          | 0.043        | 19         | 16         | 3          | 0.09             |
| 215         | Negative              | 37         | 44       | 22       | 11       | 11         |              | 37         | 80         | 12         |                  |
|             | Diffuse block         | 23         | 7        | 13       | 4        | 6          |              | 23         | 25         | 6          |                  |
| <b>ER</b>   | Negative              | 79         | 58       | 44       | 16       | 21         | <b>0.003</b> | 79         | 124        | 21         | 0.012            |
| 236         | Positive              | 1          | 3        | 8        | 4        | 2          |              | 1          | 14         | 3          |                  |
